# Supplementary material for: Synthesis, structure, and piezoelectric properties of ferroelectric and antiferroelectric NaNbO3 nanostructures
Source: Royal Society of Chemistry journal article supplement (doi:10.1039/c4ce01116c), 2014-01-01
Supplement: c4ce01116c1.pdf [file c4ce01116c1.pdf]

## Supplement

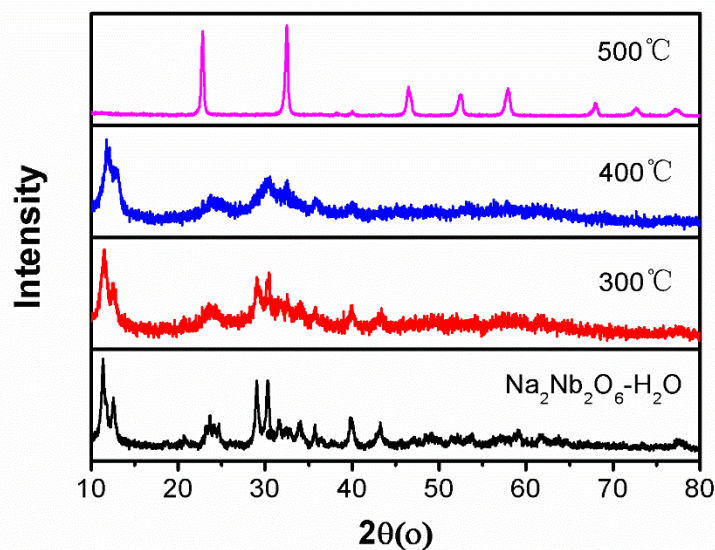

Fig. S1 XRD patterns of  $\text{Na}_2\text{Nb}_2\text{O}_6\text{-H}_2\text{O}$  and products calcined at 300°C, 400°C and 500°C for 3h

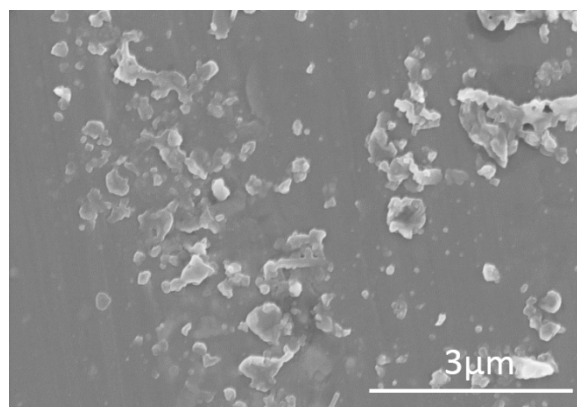

Fig. S2 SEM image of grinding  $\text{NaNbO}_3$  particles synthesized by 24h hydrothermal treatment.

Table S1

Rietveld refinement data for  $\text{NaNbO}_3$  synthesized by 24h hydrothermal treatment on the basis of *Pbma* space group

| Atoms | Atomic position |        |         |                       |
|-------|-----------------|--------|---------|-----------------------|
|       | x               | y      | z       | Uiso(Å <sup>2</sup> ) |
| Na1   | 0.7500          | 0.0000 | 0.2340  | 0.01464               |
| Na2   | 0.7430          | 0.2500 | 0.2400  | 0.01464               |
| Nb1   | 0.2583          | 0.1260 | 0.2462  | 0.00532               |
| O1    | 0.2500          | 0.0000 | 0.3110  | 0.00445               |
| O2    | 0.2402          | 0.2500 | 0.1817  | 0.00300               |
| O3    | 0.0679          | 0.1397 | 0.5443  | 0.00309               |
| O4    | 0.4919          | 0.1102 | -0.0119 | 0.00281               |

Unit cell parameters:  $a=5.5738\text{Å}$ ,  $b=15.5400\text{Å}$ ,  $c=5.5136\text{Å}$ .

**Table S2**

Rietveld refinement data for  $\text{NaNbO}_3$  obtained by annealing  $\text{Na}_2\text{Nb}_2\text{O}_6\text{-H}_2\text{O}$  precursor on the basis of  $\text{P2}_1\text{ma}$  space group

| Atom | Atomic position |        |        | Uiso( $\text{\AA}^2$ ) |
|------|-----------------|--------|--------|------------------------|
|      | x               | y      | z      |                        |
| Nb1  | 0.2697          | 0.2507 | 0.2440 | 0.00466                |
| Na1  | 0.2523          | 0.0000 | 0.7392 | 0.01384                |
| Na2  | 0.2800          | 0.5000 | 0.7415 | 0.01384                |
| O1   | 0.2401          | 0.0000 | 0.3096 | 0.00175                |
| O2   | 0.2213          | 0.5000 | 0.1895 | 0.01081                |
| O3   | 0.0265          | 0.2804 | 0.5387 | 0.01081                |
| O4   | -0.0459         | 0.2206 | 0.0380 | 0.01081                |

Unit cell parameters:  $a=5.5630 \text{ \AA}$ ,  $b=7.7748 \text{ \AA}$ ,  $c=5.5114 \text{ \AA}$ .
